# Supplementary material for: Association Between Seasonal Influenza and Absolute Humidity: Time-Series Analysis with Daily Surveillance Data in Japan
Source: PubMed Central journal article supplement (PMC7211015; doi:10.1038/s41598-020-63712-2), 2020-05-08
Supplement: 41598_2020_63712_MOESM1_ESM.pdf [file 41598_2020_63712_MOESM1_ESM.pdf]

# Supplementary Information

**Title: Association Between Seasonal Influenza and Absolute Humidity: Time-Series**

**Analysis with Daily Surveillance Data in Japan**

**Keita Shimmei<sup>1,2,\*</sup>, Takahiro Nakamura<sup>2</sup>, Chris Fook Sheng Ng<sup>3</sup>, Masahiro Hashizume<sup>4</sup>, Yoshitaka Murakami<sup>5</sup>, Aya Maruyama<sup>6</sup>, Takako Misaki<sup>6</sup>, Nobuhiko Okabe<sup>6</sup>, and Yuji Nishiwaki<sup>2</sup>**

<sup>1</sup>The World Bank, The Poverty and Equity Global Practice, Washington D.C., U.S.

<sup>2</sup>Toho University, Department of Environmental and Occupational Health, Tokyo, Japan

<sup>3</sup>Nagasaki University, School of Tropical Medicine and Global Health, Nagasaki, Japan

<sup>4</sup>Nagasaki University, Department of Paediatric Infectious Disease, Nagasaki, Japan

<sup>5</sup>Toho University, Department of Medical Statistics, Tokyo, Japan

<sup>6</sup>Kawasaki City Institute for Public Health, Kawasaki, Japan

\*shinmeikeita@gmail.com

**Table S1.** Relative risk and 95% confidence interval by models, by lags at 6, 12, 18 and 24, and by AH percentiles at 75%, 50%, 25% and 1%.

| Lag | Percentile | AH   | Model 1 |        |      | Model 2 |        |      | Model 3 |        |      | Model 4 |        |      |
|-----|------------|------|---------|--------|------|---------|--------|------|---------|--------|------|---------|--------|------|
|     |            |      | RR      | 95% CI |      | RR      | 95% CI |      | RR      | 95% CI |      | RR      | 95% CI |      |
|     |            |      |         | low    | high |         | low    | high |         | low    | high |         | low    | high |
| 6   | 75%        | 7.64 | 1.16    | 1.09   | 1.23 | 1.15    | 1.08   | 1.23 | 1.02    | 0.98   | 1.06 | 0.97    | 0.92   | 1.02 |
|     | 50%        | 5.15 | 1.20    | 1.13   | 1.27 | 1.20    | 1.13   | 1.27 | 1.05    | 1.00   | 1.10 | 1.04    | 0.98   | 1.11 |
|     | 25%        | 3.76 | 1.21    | 1.14   | 1.27 | 1.20    | 1.14   | 1.27 | 1.07    | 1.02   | 1.12 | 1.13    | 1.06   | 1.21 |
|     | 1%         | 1.95 | 1.21    | 1.14   | 1.28 | 1.21    | 1.14   | 1.28 | 1.11    | 1.05   | 1.16 | 1.30    | 1.22   | 1.39 |
| 12  | 75%        | 7.64 | 1.12    | 1.05   | 1.19 | 1.12    | 1.05   | 1.19 | 1.02    | 0.98   | 1.06 | 1.02    | 0.98   | 1.07 |
|     | 50%        | 5.15 | 1.18    | 1.12   | 1.25 | 1.18    | 1.12   | 1.25 | 1.05    | 1.00   | 1.10 | 1.12    | 1.06   | 1.19 |
|     | 25%        | 3.76 | 1.21    | 1.15   | 1.27 | 1.20    | 1.14   | 1.26 | 1.08    | 1.03   | 1.13 | 1.23    | 1.16   | 1.30 |
|     | 1%         | 1.95 | 1.22    | 1.15   | 1.29 | 1.21    | 1.14   | 1.28 | 1.12    | 1.06   | 1.18 | 1.42    | 1.33   | 1.51 |
| 18  | 75%        | 7.64 | 1.08    | 1.02   | 1.14 | 1.08    | 1.02   | 1.14 | 1.02    | 0.99   | 1.06 | 1.06    | 1.03   | 1.10 |
|     | 50%        | 5.15 | 1.14    | 1.09   | 1.19 | 1.14    | 1.08   | 1.19 | 1.05    | 1.01   | 1.09 | 1.15    | 1.10   | 1.21 |
|     | 25%        | 3.76 | 1.16    | 1.11   | 1.21 | 1.16    | 1.11   | 1.21 | 1.07    | 1.02   | 1.12 | 1.23    | 1.16   | 1.29 |
|     | 1%         | 1.95 | 1.17    | 1.11   | 1.23 | 1.17    | 1.10   | 1.23 | 1.10    | 1.05   | 1.15 | 1.34    | 1.27   | 1.42 |
| 24  | 75%        | 7.64 | 1.03    | 0.98   | 1.08 | 1.03    | 0.99   | 1.08 | 1.03    | 0.99   | 1.06 | 1.10    | 1.05   | 1.14 |
|     | 50%        | 5.15 | 1.07    | 1.03   | 1.12 | 1.07    | 1.03   | 1.12 | 1.04    | 1.00   | 1.09 | 1.14    | 1.08   | 1.20 |
|     | 25%        | 3.76 | 1.09    | 1.04   | 1.13 | 1.09    | 1.04   | 1.13 | 1.05    | 1.00   | 1.10 | 1.15    | 1.08   | 1.21 |
|     | 1%         | 1.95 | 1.08    | 1.02   | 1.15 | 1.08    | 1.02   | 1.15 | 1.05    | 1.00   | 1.10 | 1.14    | 1.07   | 1.22 |

**Table S2.** Accumulation of Relative risk over all lag days by models and by AH percentiles at 75%, 50%, 25% and 1%.

| Percentile | AH   | Model 1 |        |       |      | Model 2 |       |      | Model 3 |      |       | Model 4 |        |  |
|------------|------|---------|--------|-------|------|---------|-------|------|---------|------|-------|---------|--------|--|
|            |      | RR      | 95% CI |       | RR   | 95% CI  |       | RR   | 95% CI  |      | RR    | 95% CI  |        |  |
|            |      |         | low    | high  |      | low     | high  |      | low     | high |       | low     | high   |  |
| 75%        | 7.64 | 15.9    | 4.2    | 60.8  | 15.5 | 4.0     | 59.3  | 1.8  | 0.9     | 3.8  | 1.9   | 0.8     | 4.7    |  |
| 50%        | 5.15 | 52.5    | 15.1   | 182.8 | 49.3 | 14.2    | 171.3 | 3.5  | 1.3     | 9.4  | 12.0  | 3.6     | 40.5   |  |
| 25%        | 3.76 | 69.3    | 20.5   | 234.1 | 64.1 | 19.1    | 215.5 | 5.6  | 2.0     | 15.7 | 61.5  | 17.0    | 222.9  |  |
| 1%         | 1.95 | 74.2    | 18.0   | 306.4 | 68.3 | 16.6    | 281.0 | 10.9 | 3.6     | 32.9 | 789.2 | 198.1   | 3143.8 |  |
